# Supplementary material
Source: publisher site journal article supplement (https://www.dovepress.com/article/594260)
Supplement: Supplementary file 1 [file 594260%20Revised%20Supplementary%20information.docx]

**Supplementary information**

**Table S1.** Local dependence test in graded response model with Q3 value

| Symptom |  | I1 | I2 | I3 | I4 | I5 | I6 | I7 | I8 |
| --- | --- | --- | --- | --- | --- | --- | --- | --- | --- |
| I1 | 1 | 0.116 | -0.214 | -0.317 | -0.215 | -0.297 | -0.275 | -0.231 |
| I2 | 0.116 | 1 | -0.321 | -0.359 | -0.139 | -0.217 | -0.193 | -0.143 |
| I3 | -0.214 | -0.321 | 1 | 0.258 | -0.157 | -0.19 | -0.189 | -0.265 |
| I4 | -0.317 | -0.359 | 0.258 | 1 | -0.036 | -0.051 | -0.069 | -0.114 |
| I5 | -0.215 | -0.139 | -0.157 | -0.036 | 1 | 0.178 | 0.162 | 0.118 |
| I6 | -0.297 | -0.217 | -0.19 | -0.051 | 0.178 | 1 | 0.663 | 0.144 |
| I7 | -0.275 | -0.193 | -0.189 | -0.069 | 0.162 | 0.663 | 1 | 0.134 |
| I8 | -0.231 | -0.143 | -0.265 | -0.114 | 0.118 | 0.144 | 0.134 | 1 |
| Concern |  | I9 | I15 | I22 | I28 | I32 |  |  |  |
| I9 | 1 | -0.043 | -0.234 | 0.074 | -0.119 |  |  |  |
| I15 | -0.043 | 1 | -0.381 | -0.293 | -0.367 |  |  |  |
| I22 | -0.234 | -0.381 | 1 | -0.258 | -0.307 |  |  |  |
| I28 | 0.074 | -0.293 | -0.258 | 1 | -0.032 |  |  |  |
| I32 | -0.119 | -0.367 | -0.307 | -0.032 | 1 |  |  |  |
| Activities |  | I10 | I11 | I13 | I19 | I20 | I27 | I29 |  |
| I10 | 1 | 0.014 | -0.249 | -0.233 | -0.214 | -0.123 | -0.048 |  |
| I11 | 0.014 | 1 | 0.01 | -0.335 | -0.356 | -0.258 | -0.221 |  |
| I13 | -0.249 | 0.01 | 1 | -0.173 | -0.224 | -0.15 | -0.249 |  |
| I19 | -0.233 | -0.335 | -0.173 | 1 | 0.109 | -0.013 | -0.082 |  |
| I20 | -0.214 | -0.356 | -0.224 | 0.109 | 1 | -0.139 | -0.071 |  |
| I27 | -0.123 | -0.258 | -0.15 | -0.013 | -0.139 | 1 | 0.108 |  |
| I29 | -0.048 | -0.221 | -0.249 | -0.082 | -0.071 | 0.108 | 1 |  |
| Energy/mood |  | I12 | I17 | I23 | I24 | I25 | I31 | I35 |  |
| I12 | 1 | 0.162 | -0.317 | -0.395 | -0.046 | -0.076 | 0.052 |  |
| I17 | 0.162 | 1 | -0.292 | -0.299 | -0.053 | -0.016 | -0.041 |  |
| I23 | -0.317 | -0.292 | 1 | 0.168 | -0.303 | -0.196 | -0.256 |  |
| I24 | -0.395 | -0.299 | 0.168 | 1 | -0.303 | -0.112 | -0.332 |  |
| I25 | -0.046 | -0.053 | -0.303 | -0.303 | 1 | -0.191 | -0.068 |  |
| I31 | -0.076 | -0.016 | -0.196 | -0.112 | -0.191 | 1 | -0.076 |  |
| I35 | 0.052 | -0.041 | -0.256 | -0.332 | -0.068 | -0.076 | 1 |  |
| Control |  | I14 | I16 | I26 | I30 | I34 |  |  |  |
| I14 | 1 | -0.024 | -0.174 | -0.262 | -0.35 |  |  |  |
| I16 | -0.024 | 1 | -0.025 | -0.305 | -0.311 |  |  |  |
| I26 | -0.174 | -0.025 | 1 | -0.041 | -0.109 |  |  |  |
| I30 | -0.262 | -0.305 | -0.041 | 1 | -0.265 |  |  |  |
| I34 | -0.35 | -0.311 | -0.109 | -0.265 | 1 |  |  |  |
| Sexual function |  | I36 | I37 |  |  |  |  |  |  |
| I36 | 1 | -0.629 |  |  |  |  |  |  |
| I37 | -0.629 | 1 |  |  |  |  |  |  |

**Table S2** Extracted items with CTT and IRT from UFS-QoL.

|  | **CTT** | **IRT** | **Final SF-UFS-QoL** |
| --- | --- | --- | --- |
| Symptom severity | 1. Heavy bleeding during your menstrual period? | 1. Heavy bleeding during your menstrual period? | 1. Heavy bleeding during your menstrual period? |
| 2. Passing blood clots during your menstrual period? | 3. Variations in the length of your menstrual periods? | 2. Passing blood clots during your menstrual period? |
| Concern | 15. Made you concerned about soiling your underwear? | 15. Made you concerned about soiling your underwear? | 15. Made you concerned about soiling your underwear? |
| 22. Made you concerned about soiling bed linen? | 22. Made you concerned about soiling bed linen? | 22. Made you concerned about soiling bed linen? |
| Activities | 11. Interfered with your physical activities? | 13.Made you spend less time on exercise or other physical activities? | 13.Made you spend less time on exercise or other physical activities? |
| 13.Made you spend less time on exercise or other physical activities? | 20. Interfered with your social activities (e.g., going out to the cinema, restaurants, parties, etc)? | 20. Interfered with your social activities (e.g., going out to the cinema, restaurants, parties, etc)? |
| Energy/Mood | 24. Made you feel down-hearted and blue? | 24. Made you feel down-hearted and blue? | 24. Made you feel down-hearted and blue? |
| 25. Made you feel exhausted? | 25. Made you feel exhausted? | 25. Made you feel exhausted? |
| Control | 30. Made you feel uncertain about your future? | 30. Made you feel uncertain about your future? | 30. Made you feel uncertain about your future? |
| 34. Made you feel that you are not in control of your health? | 34. Made you feel that you are not in control of your health? | 34. Made you feel that you are not in control of your health? |
| Sexual function | 36. Decreased your sex drive? | 36. Decreased your sex drive? | 36. Decreased your sex drive? |

**Table S3**. Missing data of each selected item in validated data set (n=970)

| Item | Preoperative | | |  | 6-month after discharge | | |  | 12-month after discharge | | |
| --- | --- | --- | --- | --- | --- | --- | --- | --- | --- | --- | --- |
| n | Means±SD | missing |  | n | Means±SD | missing |  | n | Means±SD | missing |
| U_1 | 970 | 2.2±1.17 | 0.00% |  | 939 | 1.45±0.7 | 3.20% |  | 900 | 1.32±0.57 | 7.22% |
| U_2 | 970 | 2.09±0.99 | 0.00% |  | 939 | 1.54±0.64 | 3.20% |  | 900 | 1.42±0.59 | 7.22% |
| U_15 | 970 | 2.45±1.17 | 0.00% |  | 939 | 1.9±0.91 | 3.20% |  | 900 | 1.71±0.86 | 7.22% |
| U_22 | 970 | 2.5±1.17 | 0.00% |  | 939 | 1.91±0.92 | 3.20% |  | 898 | 1.69±0.87 | 7.42% |
| U_11 | 970 | 2.11±1.1 | 0.00% |  | 936 | 1.74±0.83 | 3.51% |  | 899 | 1.54±0.74 | 7.32% |
| U_19 | 970 | 1.77±0.89 | 0.00% |  | 938 | 1.49±0.71 | 3.30% |  | 900 | 1.44±0.66 | 7.22% |
| U_24 | 970 | 2.04±0.95 | 0.00% |  | 939 | 1.73±0.78 | 3.20% |  | 899 | 1.59±0.7 | 7.32% |
| U_12 | 970 | 2.06±0.98 | 0.00% |  | 938 | 1.81±0.85 | 3.30% |  | 900 | 1.61±0.74 | 7.22% |
| U_16 | 970 | 1.93±0.95 | 0.00% |  | 939 | 1.62±0.76 | 3.20% |  | 899 | 1.51±0.74 | 7.32% |
| U_34 | 969 | 1.86±0.91 | 0.10% |  | 938 | 1.52±0.72 | 3.30% |  | 900 | 1.44±0.67 | 7.22% |
| U_36 | 968 | 2.27±1.06 | 0.21% |  | 937 | 1.83±0.88 | 3.40% |  | 900 | 1.66±0.83 | 7.22% |

| **Table S4.** Relationship of UFS-QoL-11 Subscale Scores and SF-36* | | | | | | | | |
| --- | --- | --- | --- | --- | --- | --- | --- | --- |
|  | **PF** | **PR** | **BP** | **GH** | **VT** | **SF** | **ER** | **MH** |
| ***Baseline*** |  |  |  |  |  |  |  |  |
| Symptom severity | -0.26 | -0.28 | -0.23 | -0.22 | -0.25 | -0.19 | -0.25 | -0.17 |
| Concern | 0.18 | 0.19 | 0.15 | 0.24 | 0.22 | 0.22 | 0.18 | 0.19 |
| Daily life interference | 0.38 | 0.38 | 0.35 | 0.50 | 0.54 | 0.47 | 0.41 | 0.49 |
| ***Treatment Month 6*** |  |  |  |  |  |  |  |  |
| Symptom severity | -0.16 | -0.1 | -0.19 | -0.13 | -0.13 | -0.14 | -0.14 | -0.16 |
| Concern | 0.22 | 0.16 | 0.21 | 0.20 | 0.21 | 0.16 | 0.15 | 0.23 |
| Daily life interference | 0.41 | 0.36 | 0.38 | 0.45 | 0.44 | 0.33 | 0.35 | 0.42 |
| ***Treatment Month 12*** |  |  |  |  |  |  |  |  |
| Symptom severity | -0.33 | -0.26 | -0.27 | -0.21 | -0.18 | -0.21 | -0.23 | -0.16 |
| Concern | 0.34 | 0.2 | 0.21 | 0.26 | 0.21 | 0.13 | 0.24 | 0.20 |
| Daily life interference | 0.46 | 0.35 | 0.38 | 0.44 | 0.39 | 0.36 | 0.37 | 0.4 |
| * Spearman correlations: all *P*<0.0001; | | | | | | | | |
| Abbreviation: UFS-QoL-11, the 11 items short form uterine fibroid symptom and quality of life; PF, Physical Functioning; RP, Role-physical; BP, Bodily Pain; GH, General Health; VT, Vitality; SF, Social Functioning; RE, Role-emotional; MH, Mental Health | | | | | | | | |

| **Table S5.** Known-group validity: comparison of UFS-QOL-11 symptom and quality of life scores and known health status | | | | | | | | | | | | |
| --- | --- | --- | --- | --- | --- | --- | --- | --- | --- | --- | --- | --- |
|  | **Baseline** | | | | **6-month** | | | | **12-month** | | | | |
|  | Gooda | Poorb | Mean differencec | Effect sized | Good | Poor | Mean difference | Effect size | Good | Poor | Mean difference | Effect size |
| N | 636 | 334 |  |  | 780 | 156 |  |  | 793 | 107 |  |  |
| Symptom severity | 26.55±23.92 | 32.63±25.95 | 6.1 (2.8 to 9.3) | 0.26* | 11.54±13.37 | 17.07±17.97 | 5.5 (3.1 to 8) | 0.41* | 8.2±11.38 | 16.59±17.15 | 8.4(5.9 to 10.9) | 0.74* |
| Concern | 65.39±26.87 | 58.68±26.84 | -6.7 (-10.3 to -3.1) | -0.25* | 79.47±19.18 | 67.47±25.9 | -12 (-15.5 to -8.5) | -0.63* | 84.06±18.44 | 71.5±26.59 | -12.6(-16.5 to -8.6) | -0.68* |
| Daily life interference | 78.4±15.92 | 67.95±18.3 | -10.4(-12.7 to 8.2) | -0.65* | 85.21±12.33 | 72.79±17.76 | -12.4 (-14.7 to -10.1) | -1.01* | 88.2±10.74 | 73.15±17.76 | -15.1(-17.5 to -12.7) | -1.41* |
| Abbreviations: UFS-QoL-11, the 11 items short form uterine fibroid symptom and quality of life; | | | | | | | | | | | | |
| a Good health status: patients reported SF-36-1 “In general, would you say your health is excellent, very good, and good” | | | | | | | | | | | | |
| b Poor health status: patients reported fair, or poor. | | | | | | | | | | | | |
| c mean difference: Good health status vs. Poor health status | | | | | | | | | | | | |
| d A value of 0.2 was considered as a ‘small’ effect, 0.5 a ‘moderate’ effect, and ≥0.8 a ‘large’ effect. | | | | | | | | | | | | |
| * P<0.001 | | | | | | | | | | | | |

**Figure S1. Final UFS-QoL-11 questionnaire**


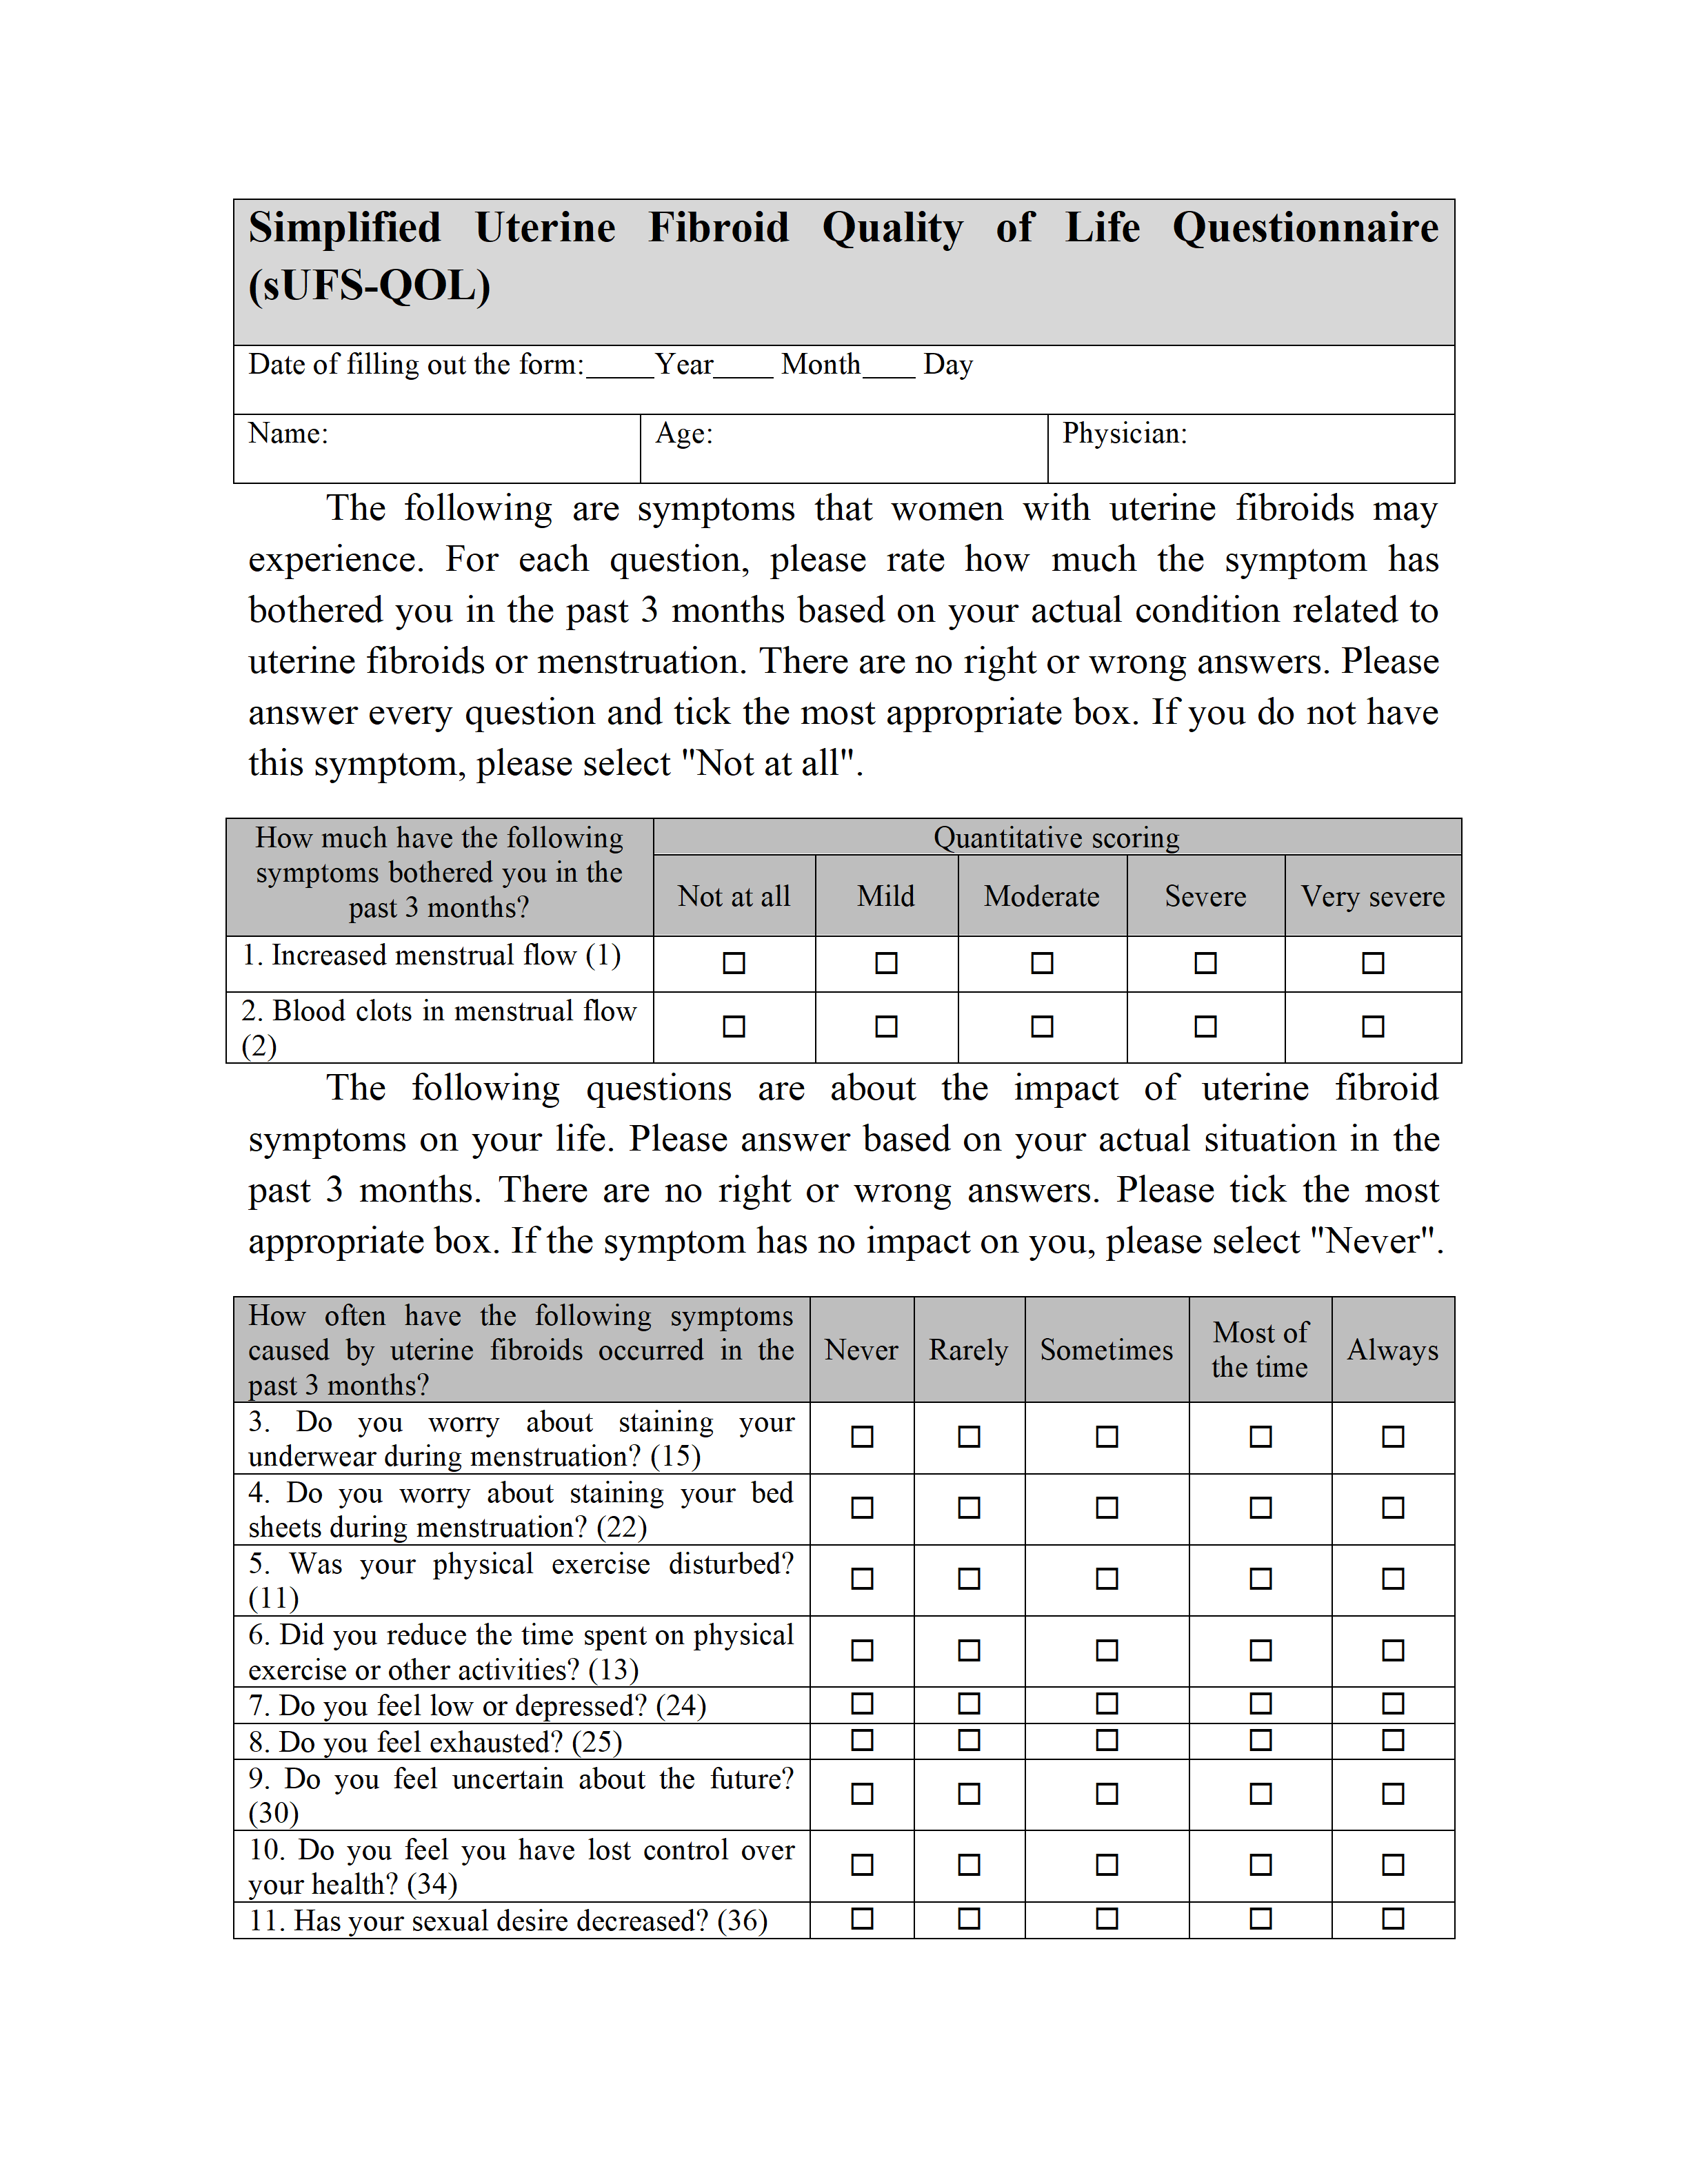


**Supplementary Method: Scoring Method for the UFS-QoL-11**

To calculate a symptom score for symptom severity, create a summed score from the items listed below and then use the formula below the table to transform the value. This will provide symptom scores where higher score values are indicative of greater symptom severity or bother and lower scores will indicate minimal symptom severity (high scores = bad)

| Scale | Sum Item Values | Lowest and Highest Possible Raw Scores | Possible Raw Score Range |
| --- | --- | --- | --- |
| Symptom Severity | Sum 1 – 2 | 2, 10 | 8 |

For the HRQL subscales (concern, activities, energy/mood, control, and sexual function), create summed scores of the items listed below for each individual subscale. To calculate the HRQL total score, sum the value of each individual subscale (do not sum individual items). Use the formula below the table to transform all values. Higher scores will be indicative of better HRQL (high = good).

| Scale | Sum Item Values | Lowest and Highest Possible Raw Scores | Possible Raw Score Range |
| --- | --- | --- | --- |
| Daily life interference | 5+6+7+8+9+10+11 | 7, 35 | 28 |
| Concern | 3 + 4 | 2, 10 | 8 |
| HRQL TOTAL | Sum of 2 Subscale Scores | 9, 45 | 36 |

**Formula for transformation of HRQL raw scores ONLY:**

**Missing Items**

For the subscale analyses, if < 50% of the scale items are missing, the scale should be retained with the mean scale score of the items present used to impute a score for the missing items. If ≥ 50% of the items are missing, no scale score should be calculated, the subscale score should be considered missing. If a subscale score is missing, the HRQL total cannot be calculated.
